# Supplementary material
Source: PubMed Central journal article supplement (PMC1750904)

**a**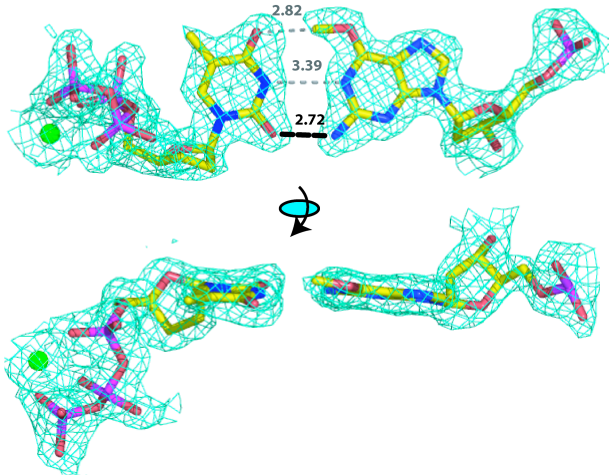**b**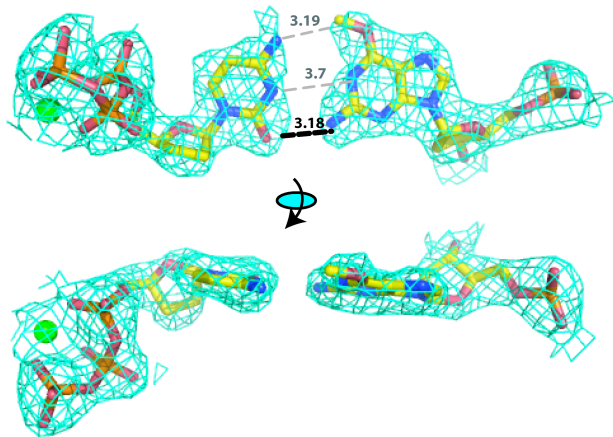

Supplement: pnas_0609580103_1.pdf [file pnas_0609580103_1.pdf]

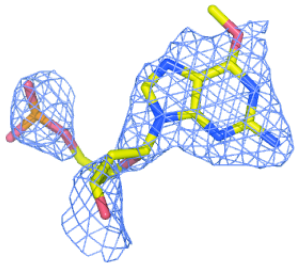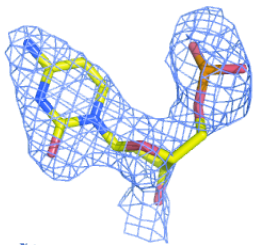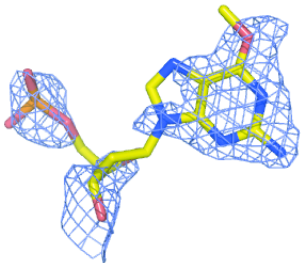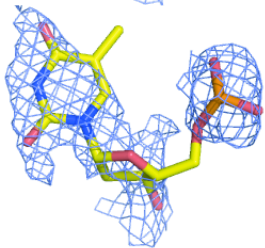

Supplement: pnas_0609580103_2.pdf [file pnas_0609580103_2.pdf]
